# Supplementary material for: Impact of IL10, MTP, SOD2, and APOE Gene Polymorphisms on the Severity of Liver Fibrosis Induced by HCV Genotype 4
Source: MDPI journal article supplement (doi:10.3390/v13040714), 2021-04-20
Supplement: s1 [file s1]

## Supplementary Data

# Impact of *IL10*, *MTP*, *SOD2*, and *APOE* Gene Polymorphisms on the Severity of Liver Fibrosis Induced by HCV Genotype 4

Amr Ali Hemeda <sup>1</sup>, Amal Ahmad Mohamed <sup>2</sup>, Ramy Karam Aziz <sup>3</sup>, Mohamed S. Abdel-Hakeem <sup>3</sup> and Marwa Ali-Tammam <sup>1,\*</sup>

<sup>1</sup> Department of Microbiology and Immunology, Faculty of Pharmaceutical Sciences and Pharmaceutical Industries, Future University in Egypt, Cairo 11835, Egypt; amr.ali@fue.edu.eg

<sup>2</sup> Department of Biochemistry and Molecular Biology, National Hepatology and Tropical Medicine Research Institute, Cairo 11562, Egypt; amalahmedhc@yahoo.com

<sup>3</sup> Department of Microbiology and Immunology, Faculty of Pharmacy, Cairo University, Cairo 11562, Egypt; ramy.aziz@gmail.com (R.K.A.); mohamed.salaheldin@pharma.cu.edu.eg (M.S.A.-H.)

\* Correspondence: marwa.ali@fue.edu.eg

**Supplementary Table 1:** Patients' demographic data

| Demographic data   | Mild group<br>(N= 59) | Severe group<br>(N= 41) | Test of Sig.    | p-value |
|--------------------|-----------------------|-------------------------|-----------------|---------|
|                    | No.                   | No.                     |                 |         |
| <b>Gender</b>      |                       |                         |                 |         |
| Males              | 37                    | 29                      | Chi-square test | 0.405   |
| Females            | 22                    | 12                      |                 |         |
| <b>Age (years)</b> |                       |                         |                 |         |
| Mean $\pm$ SD.     | 41.0 $\pm$ 8.0        | 38.95 $\pm$ 7.82        | Student t-test  | 0.207   |

p-value for comparisons between mild and severe fibrosis groups.

**Supplementary Table 2:** Patients' clinical data

| Laboratory investigations             | Mild group<br>(N= 59) | Severe group<br>(N= 41) | Chi-Square<br><i>p</i> -value |
|---------------------------------------|-----------------------|-------------------------|-------------------------------|
|                                       | Mean $\pm$ SD.        | Mean $\pm$ SD.          |                               |
| Albumin (g/dL)                        | 3.96 $\pm$ 0.37       | 3.74 $\pm$ 0.42         | 0.008**                       |
| Alpha Feto-Protein (ng/ml)            | 13.05 $\pm$ 5.87      | 14.07 $\pm$ 18.34       | 0.033*                        |
| TSH (IU/L)                            | 3.70 $\pm$ 0.71       | 3.34 $\pm$ 0.82         | 0.022*                        |
| ALP (IU/L)                            | 136.44 $\pm$ 42.97    | 113.61 $\pm$ 53.61      | 0.037*                        |
| AST (IU/L)                            | 86.63 $\pm$ 60.22     | 92.29 $\pm$ 53.72       | 0.334                         |
| ALT (IU/L)                            | 75.85 $\pm$ 48.26     | 68.07 $\pm$ 33.47       | 0.725                         |
| Total Bilirubin (mg/dL)               | 1.07 $\pm$ 0.37       | 0.99 $\pm$ 0.46         | 0.125                         |
| Direct bilirubin (mg/dL)              | 0.24 $\pm$ 0.14       | 0.27 $\pm$ 0.22         | 0.478                         |
| Blood glucose (mg/dL)                 | 98.92 $\pm$ 16.02     | 97.46 $\pm$ 16.43       | 0.660                         |
| Hemoglobin (Hb) (g/dL)                | 11.91 $\pm$ 1.75      | 11.55 $\pm$ 1.80        | 0.318                         |
| Creatinine (mg/dL)                    | 0.97 $\pm$ 0.16       | 1.0 $\pm$ 0.19          | 0.847                         |
| Platelet (10 <sup>3</sup> / $\mu$ L)) | 271.08 $\pm$ 69.61    | 286.41 $\pm$ 75.42      | 0.450                         |
| WBCs (cells/mm <sup>3</sup> )         | 7938.59 $\pm$ 1696.06 | 7582.90 $\pm$ 1803.64   | 0.150                         |

Chi-square *p*-values for comparisons between mild and Severe groups:

\* *p* < 0.05, \*\* *p* < 0.01, and \*\*\* *p* < 0.001.
